# Supplementary material for: Initial Genomics of the Human Nucleolus
Source: PubMed Central journal article supplement (PMC2845662; doi:10.1371/journal.pgen.1000889), 2010-03-26
Supplement: pgen.1000889.s006.pdf [file pgen.1000889.s006.pdf]

### satellites

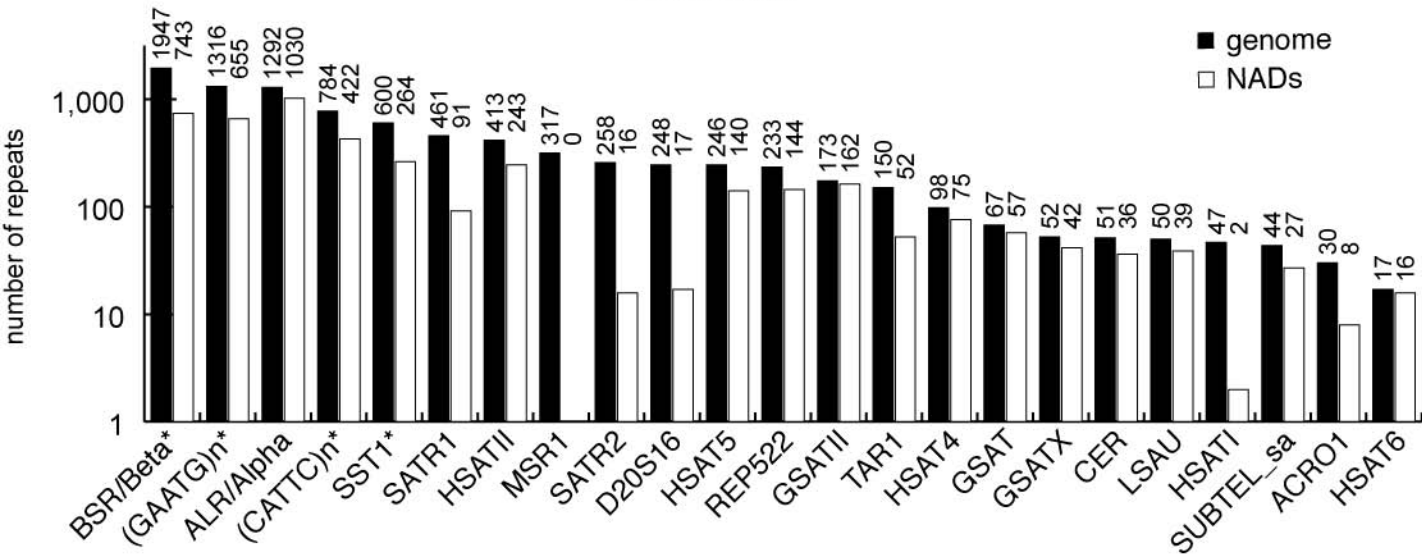

### satellites in 454 sequence reads

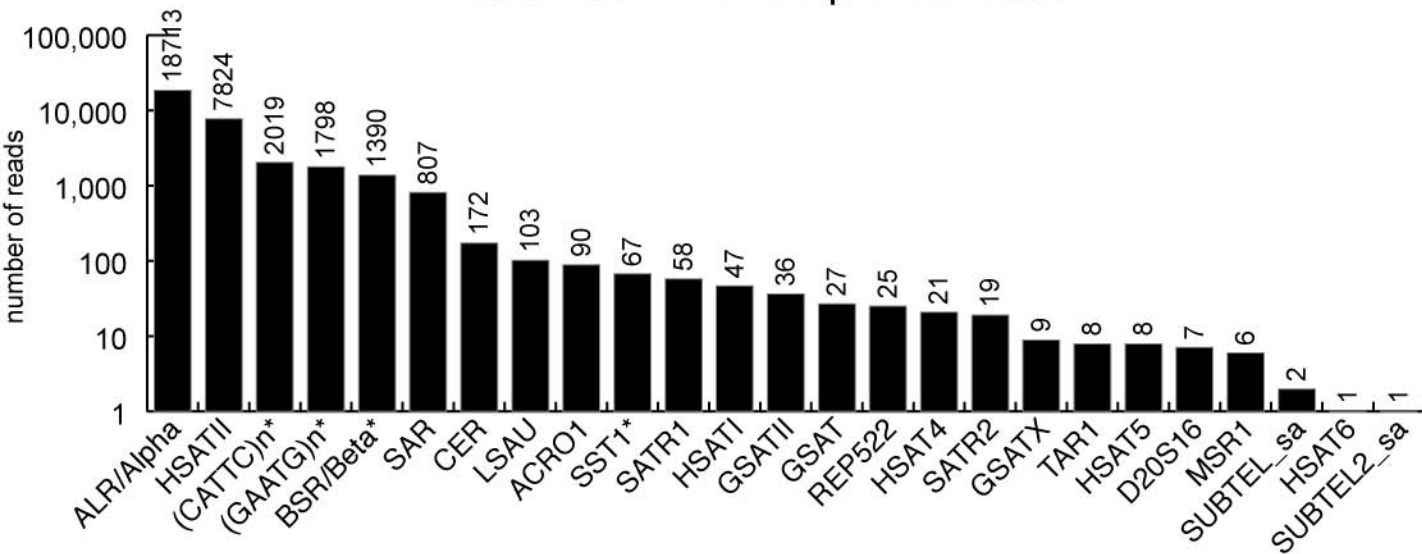

Fig. S6.
