# Supplementary material for: Initial Genomics of the Human Nucleolus
Source: PLoS Genet. 2010 Mar 26;6(3):e1000889. doi: 10.1371/journal.pgen.1000889 (PMC2845662; doi:10.1371/journal.pgen.1000889)
Supplement: Table S7 — Summary of 3D FISH experiments. BAC locations, allele and cell counts, furthermore nucleolus association frequencies in HeLa and IMR90 cells are shown. The results of transcription inhibition experiments are summarised in the lower part of the table and illustrated in Figure S9. (0.02 MB XLS) [file pgen.1000889.s018.xls]

## Sheet: Table S7 3D-FISH
selected from	454 results	454 results	aCGH results	aCGH/454 results	aCGH results
target	REXO1L	7SK	27 ZNF	FRG2C	FRG2B
BAC	RP11-90G23	RP11-173M10	RP11-44B13	RP11-89H10	RP11-413F20
	8q21.2	13q21.1	19q13.12	3p12.3	10q26.3
HeLa (alleles/cells)	120/39	155/41	126/42	84/43	125/42
% alleles	23.3	27.1	36.5	36.9	32
% cells	64.1	80.5	73.8	65.1	73.8
IMR90 (alleles/cells)	82/41	87/44	80/41	89/44	84/42
% alleles	31.7	28.7	42.5	25.8	23.8
% cells	56.1	50	70.7	47.7	40.5
		literature				literature
control	REXO1	5S	ZNF557	FRG2C ctrl	FRG2B ctrl	X cen
BAC	RP11-81M8	RP5-915N17	RP11-1137G4	RP11-89O2	RP11-123G19	RP11-434B14
	19p13.3	1q42.13	19p13.3 - 19p13.2	3p14.1	10q24.1	Xq11.1
HeLa (alleles/cells)	116/39	246/84	130/42	84/43	127/42	80/40
% alleles	6.1	24	11.5	15.5	13.4	32.5
% cells	15.4	56	33.3	27.9	38.1	55
IMR90 (alleles/cells)	82/41	82/41	81/41	90/44	84/42	91/44
% alleles	8.5	6.1	19.8	13.3	7.1	25.3
% cells	17.1	12.2	34.1	27.3	16.7	43.2
		REXO1L	REXO1	5S
		RP11-90G23	RP11-81M8	RP5-915N17
		8q21.2	19p13.3	1q42.13
Pol II inhibition (alleles/cells)		117/40	103/40	117/40
	% alleles	10.3	3.9	5.1
	% cells	30	10	15
Pol II+III inhibition (alleles/cells)		112/40	112/41	115/41
	% alleles	11.6	2.7	8.7
	% cells	27.5	7.3	19.5
Pol I inhibition (alleles/cells)		117/40	102/40	115/40
	% alleles	16.2	1	7
	% cells	35	2.5	20		Table S7
